# Supplementary material for: Lack of detection of human papillomavirus DNA in prostate carcinomas in patients from northeastern Brazil
Source: PubMed Central journal article supplement (PMC4807381; doi:10.1590/1678-4685-gmb-2015-0122), 2016
Supplement: 1415-4757-gmb-39-1-24-Suppl01.pdf [file 1415-4757-gmb-39-1-24-Suppl01.pdf]

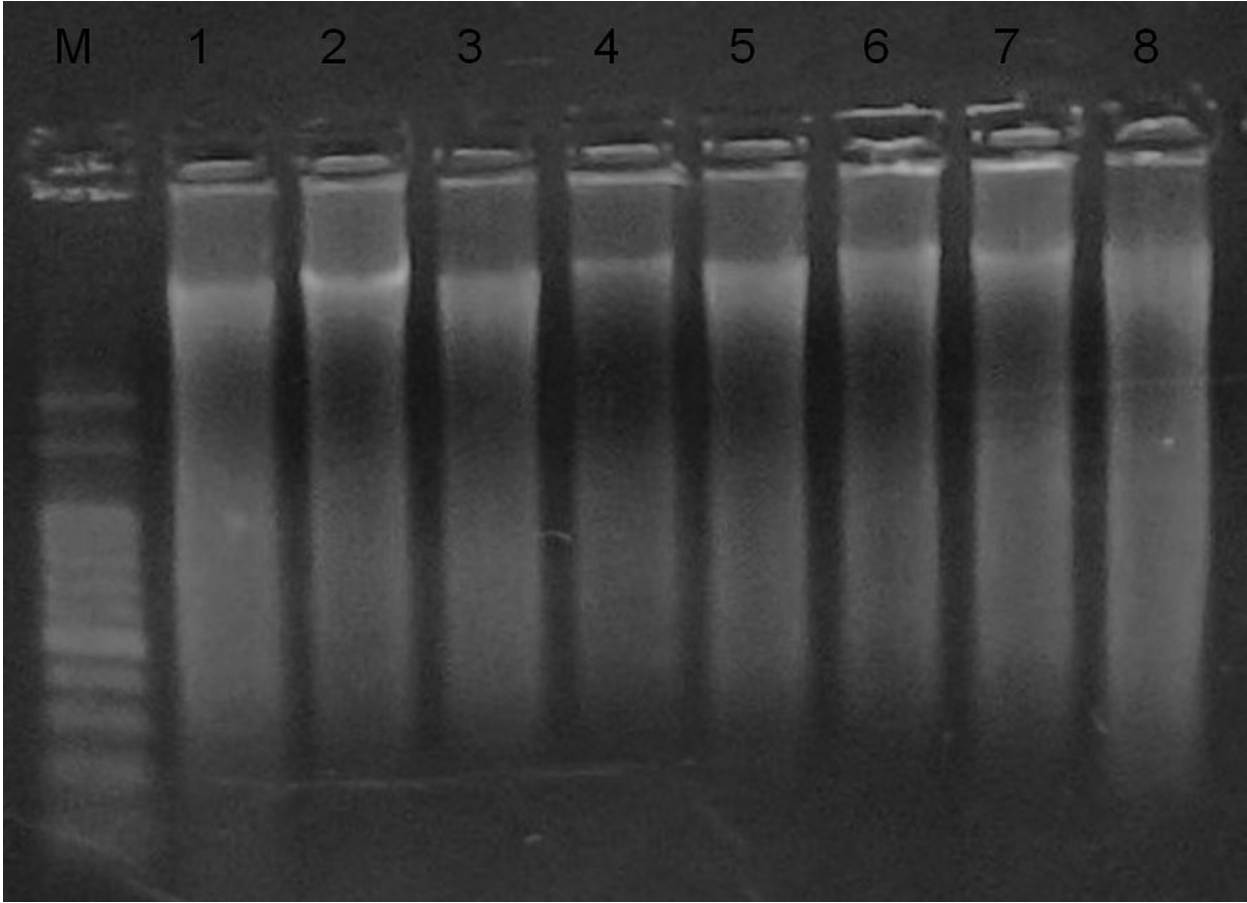

**Figure S1** - Agarose gel electrophoresis (0.8%) of total DNA extracted from prostate tissue (lines 1-8). M, 100 bp ladder.
