# Supplementary material for: Lack of detection of human papillomavirus DNA in prostate carcinomas in patients from northeastern Brazil
Source: PubMed Central journal article supplement (PMC4807381; doi:10.1590/1678-4685-gmb-2015-0122), 2016
Supplement: 1415-4757-gmb-39-1-24-Suppl02.pdf [file 1415-4757-gmb-39-1-24-Suppl02.pdf]

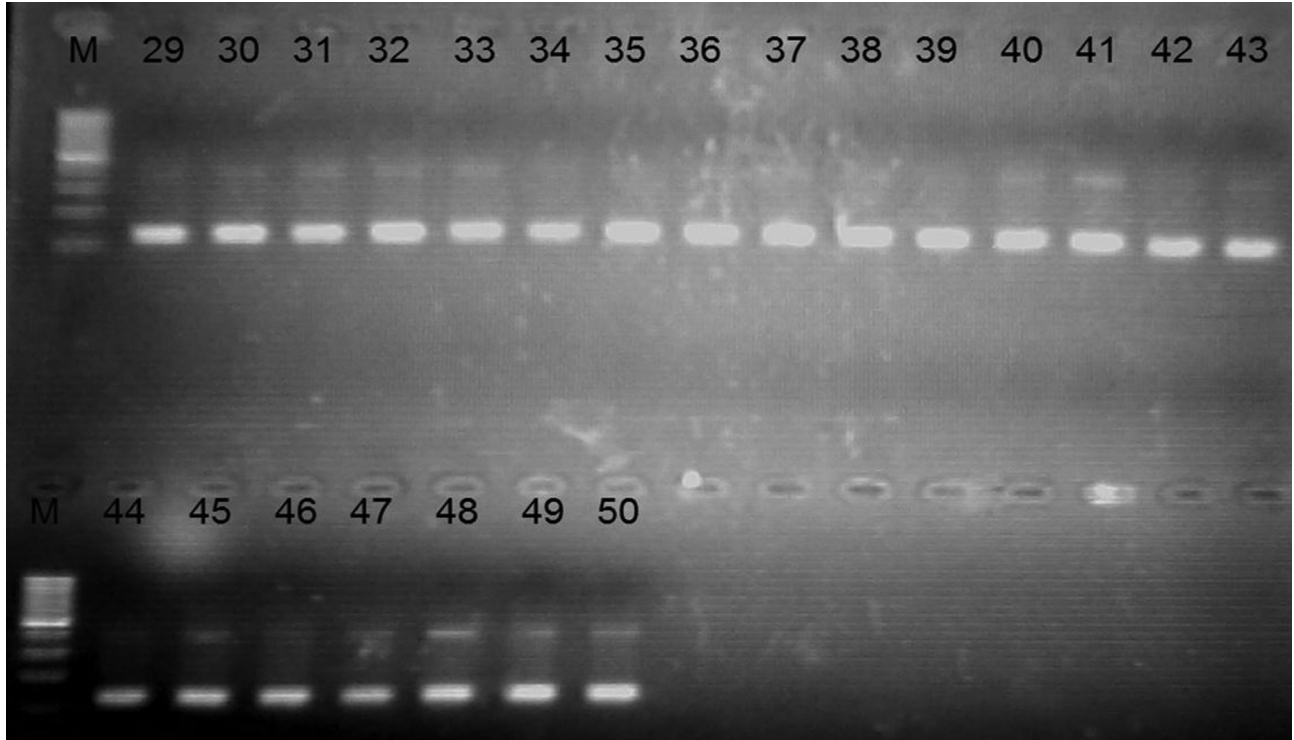

**Figure S2** - Amplification results of DNA extracted from prostate tissue using *MDM2* gene primers separated by (121 bp, lines 29-50) separated by agarose gel electrophoresis (2%). M, 100 bp ladder.
